# Supplementary material for: Ligand-induced conformational selection predicts the selectivity of cysteine protease inhibitors
Source: PubMed Central journal article supplement (PMC6922342; doi:10.1371/journal.pone.0222055), 2019-12-19
Supplement: pone.0222055.s001.pdf [file pone.0222055.s001.pdf]

Table S 1 - Auxiliary metrics derived from two first principal components obtained for system all systems studied. A, N and C are defined as the set of bins occupied by Apo, noncovalent and covalent simulations and  $n$  the intersection of set.

| Metrics   | A    | N   | C   | A∩N | N∩C | A∩C |
|-----------|------|-----|-----|-----|-----|-----|
| Complex   |      |     |     |     |     |     |
| CatK-ICK  | 376  | 213 | 186 | 206 | 117 | 136 |
| CatK-ICL  | 236  | 152 | 181 | 93  | 125 | 132 |
| CatK-ICR  | 320  | 193 | 168 | 181 | 155 | 149 |
| CatK-IKR  | 354  | 235 | 188 | 227 | 156 | 156 |
| CatL-ICK  | 509  | 399 | 185 | 345 | 101 | 152 |
| CatL-ICL  | 366  | 138 | 147 | 138 | 121 | 147 |
| CatL-ICR  | 405  | 225 | 194 | 210 | 84  | 168 |
| CatL-IKR  | 472  | 394 | 262 | 383 | 141 | 199 |
| Cruz-BCR  | 1194 | 496 | 532 | 451 | 0   | 458 |
| Cruz-ICK  | 621  | 473 | 318 | 415 | 197 | 187 |
| Cruz-ICL  | 498  | 350 | 254 | 341 | 250 | 248 |
| Cruz-ICR  | 689  | 409 | 329 | 368 | 263 | 281 |
| Cruz-IKR  | 770  | 447 | 293 | 371 | 210 | 146 |
| Cruz-n409 | 1232 | 461 | 543 | 408 | 412 | 500 |
| Cruz-n544 | 1251 | 641 | 577 | 637 | 339 | 437 |
| Cruz-n568 | 1216 | 733 | 675 | 689 | 278 | 428 |
| Cruz-n569 | 1046 | 841 | 549 | 725 | 219 | 213 |
