# Supplementary material for: Ligand-induced conformational selection predicts the selectivity of cysteine protease inhibitors
Source: PubMed Central journal article supplement (PMC6922342; doi:10.1371/journal.pone.0222055), 2019-12-19

Figure S 2 Distance between ICK nitrile and sulfur from Cys25 residue (first column) e RMSD of ICK ligand (second column) complexed with cruzain, cathepsin K and cathepsin L (first, second and third row respectively). Black vertical bars delimit the replicates. Black and red lines represent respectively Round 1 and 2 simulations.

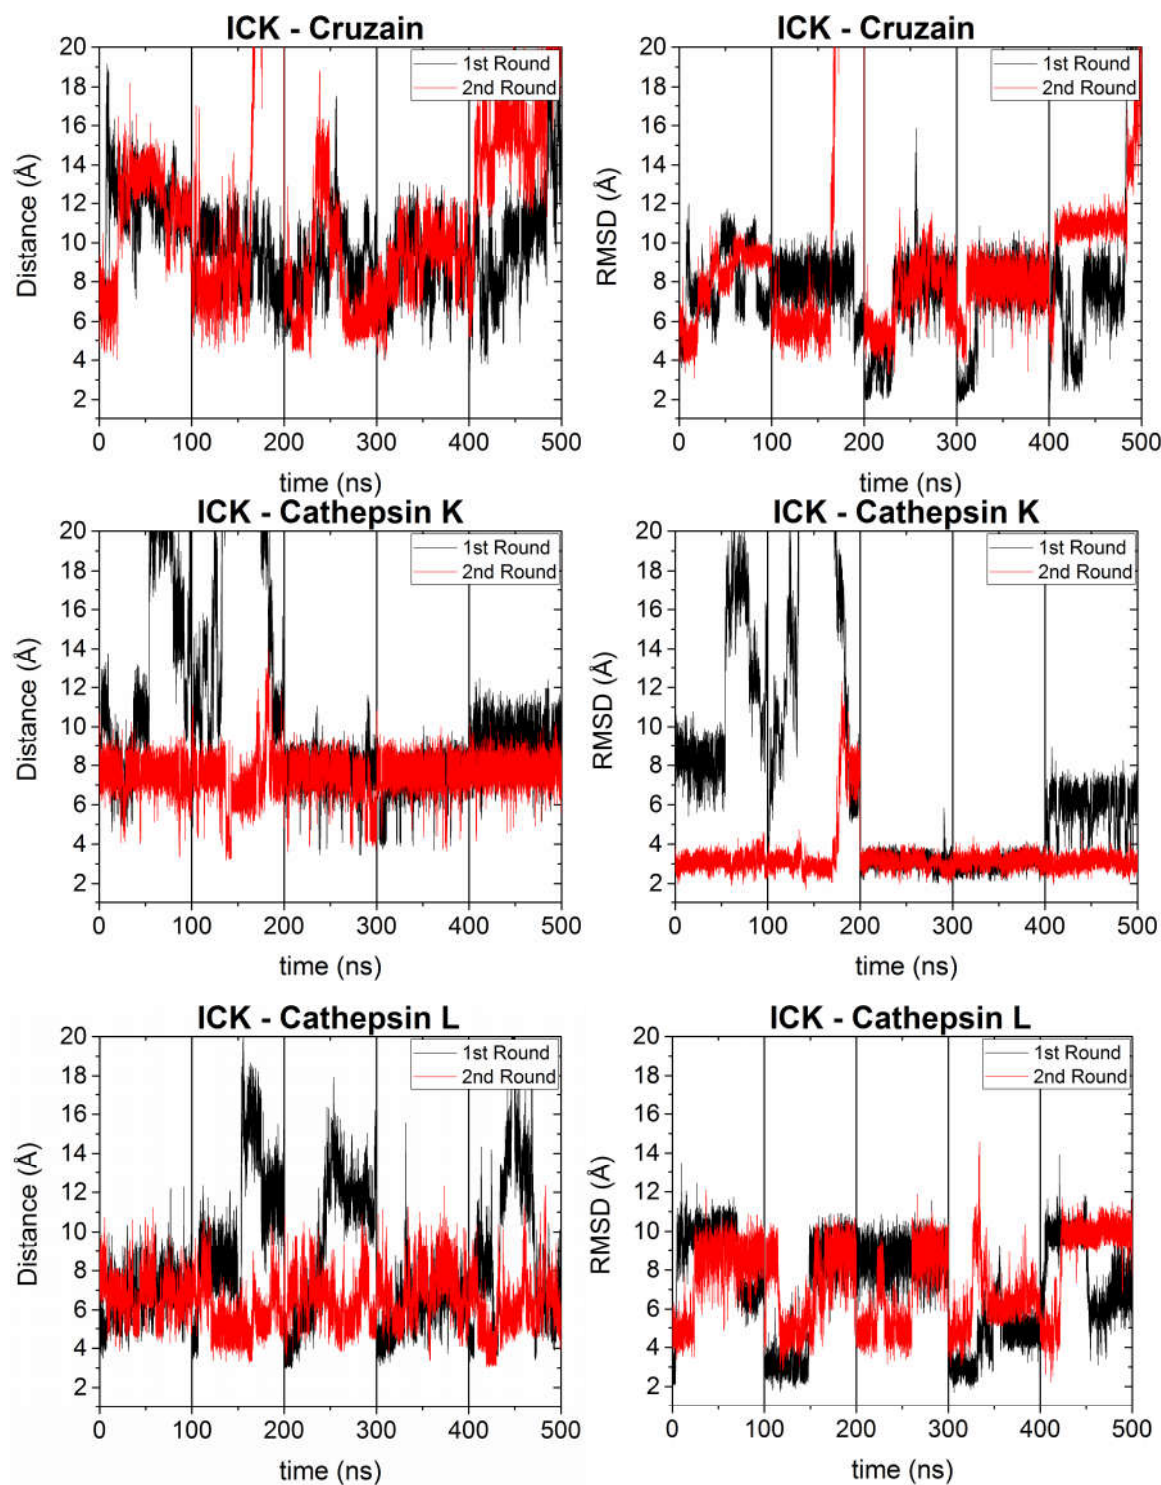

Supplement: pone.0222055.s003.pdf [file pone.0222055.s003.pdf]
