# Supplementary material for: Ligand-induced conformational selection predicts the selectivity of cysteine protease inhibitors
Source: PubMed Central journal article supplement (PMC6922342; doi:10.1371/journal.pone.0222055), 2019-12-19

Figure S 10 - Projection over the first two principal components of cruzain (first row), cathepsin K (second row) and cathepsin L (third row) simulation frames in its apo form and complexed with noncovalent and covalent forms of ligand ICK (black, red and green dots, respectively).

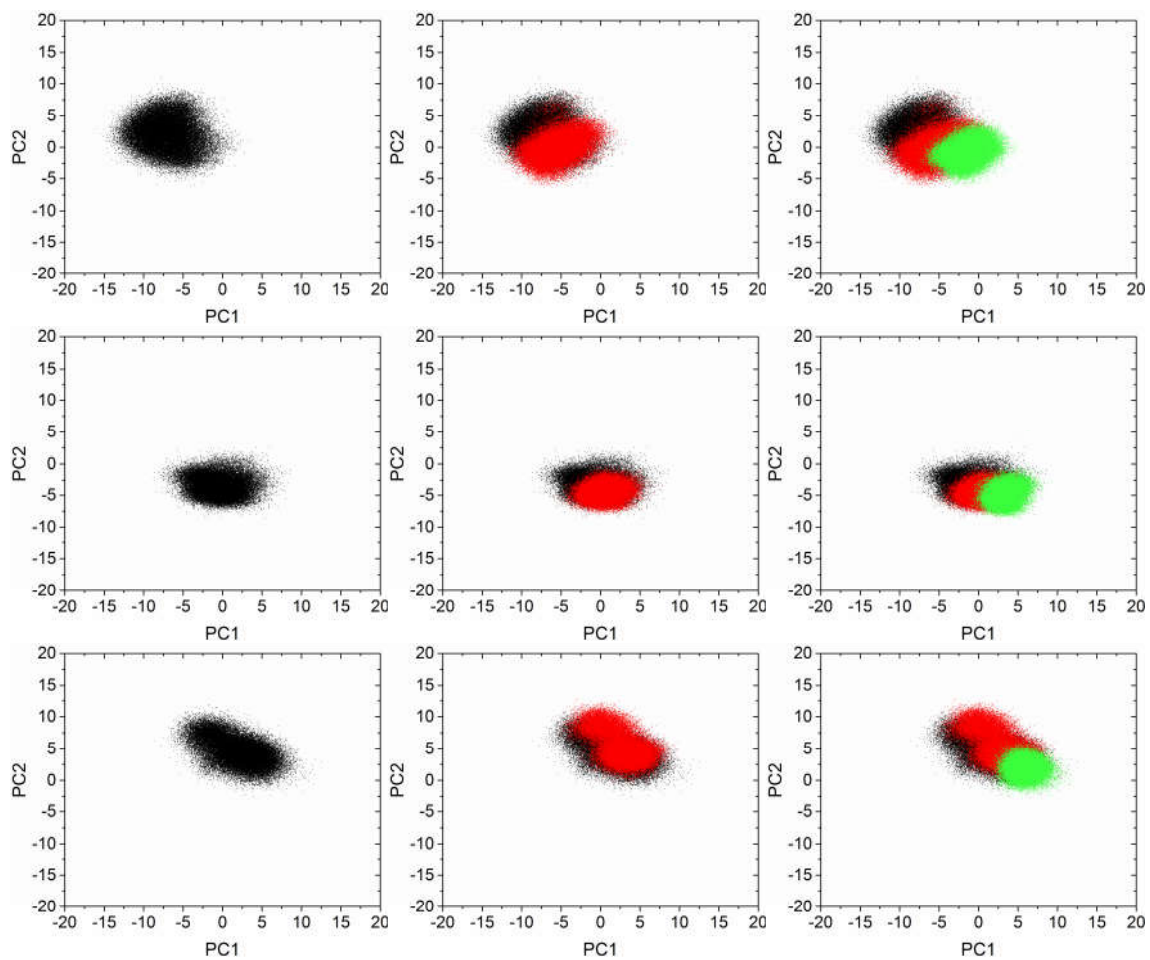

Supplement: pone.0222055.s011.pdf [file pone.0222055.s011.pdf]
